# Supplementary figures and images for: Source apportionment resolved by time-of-day for improved deconvolution of primary source contributions to air pollution
Source: Copernicus journal article supplement (doi:10.5194/amt-2022-76), 2022-03-30

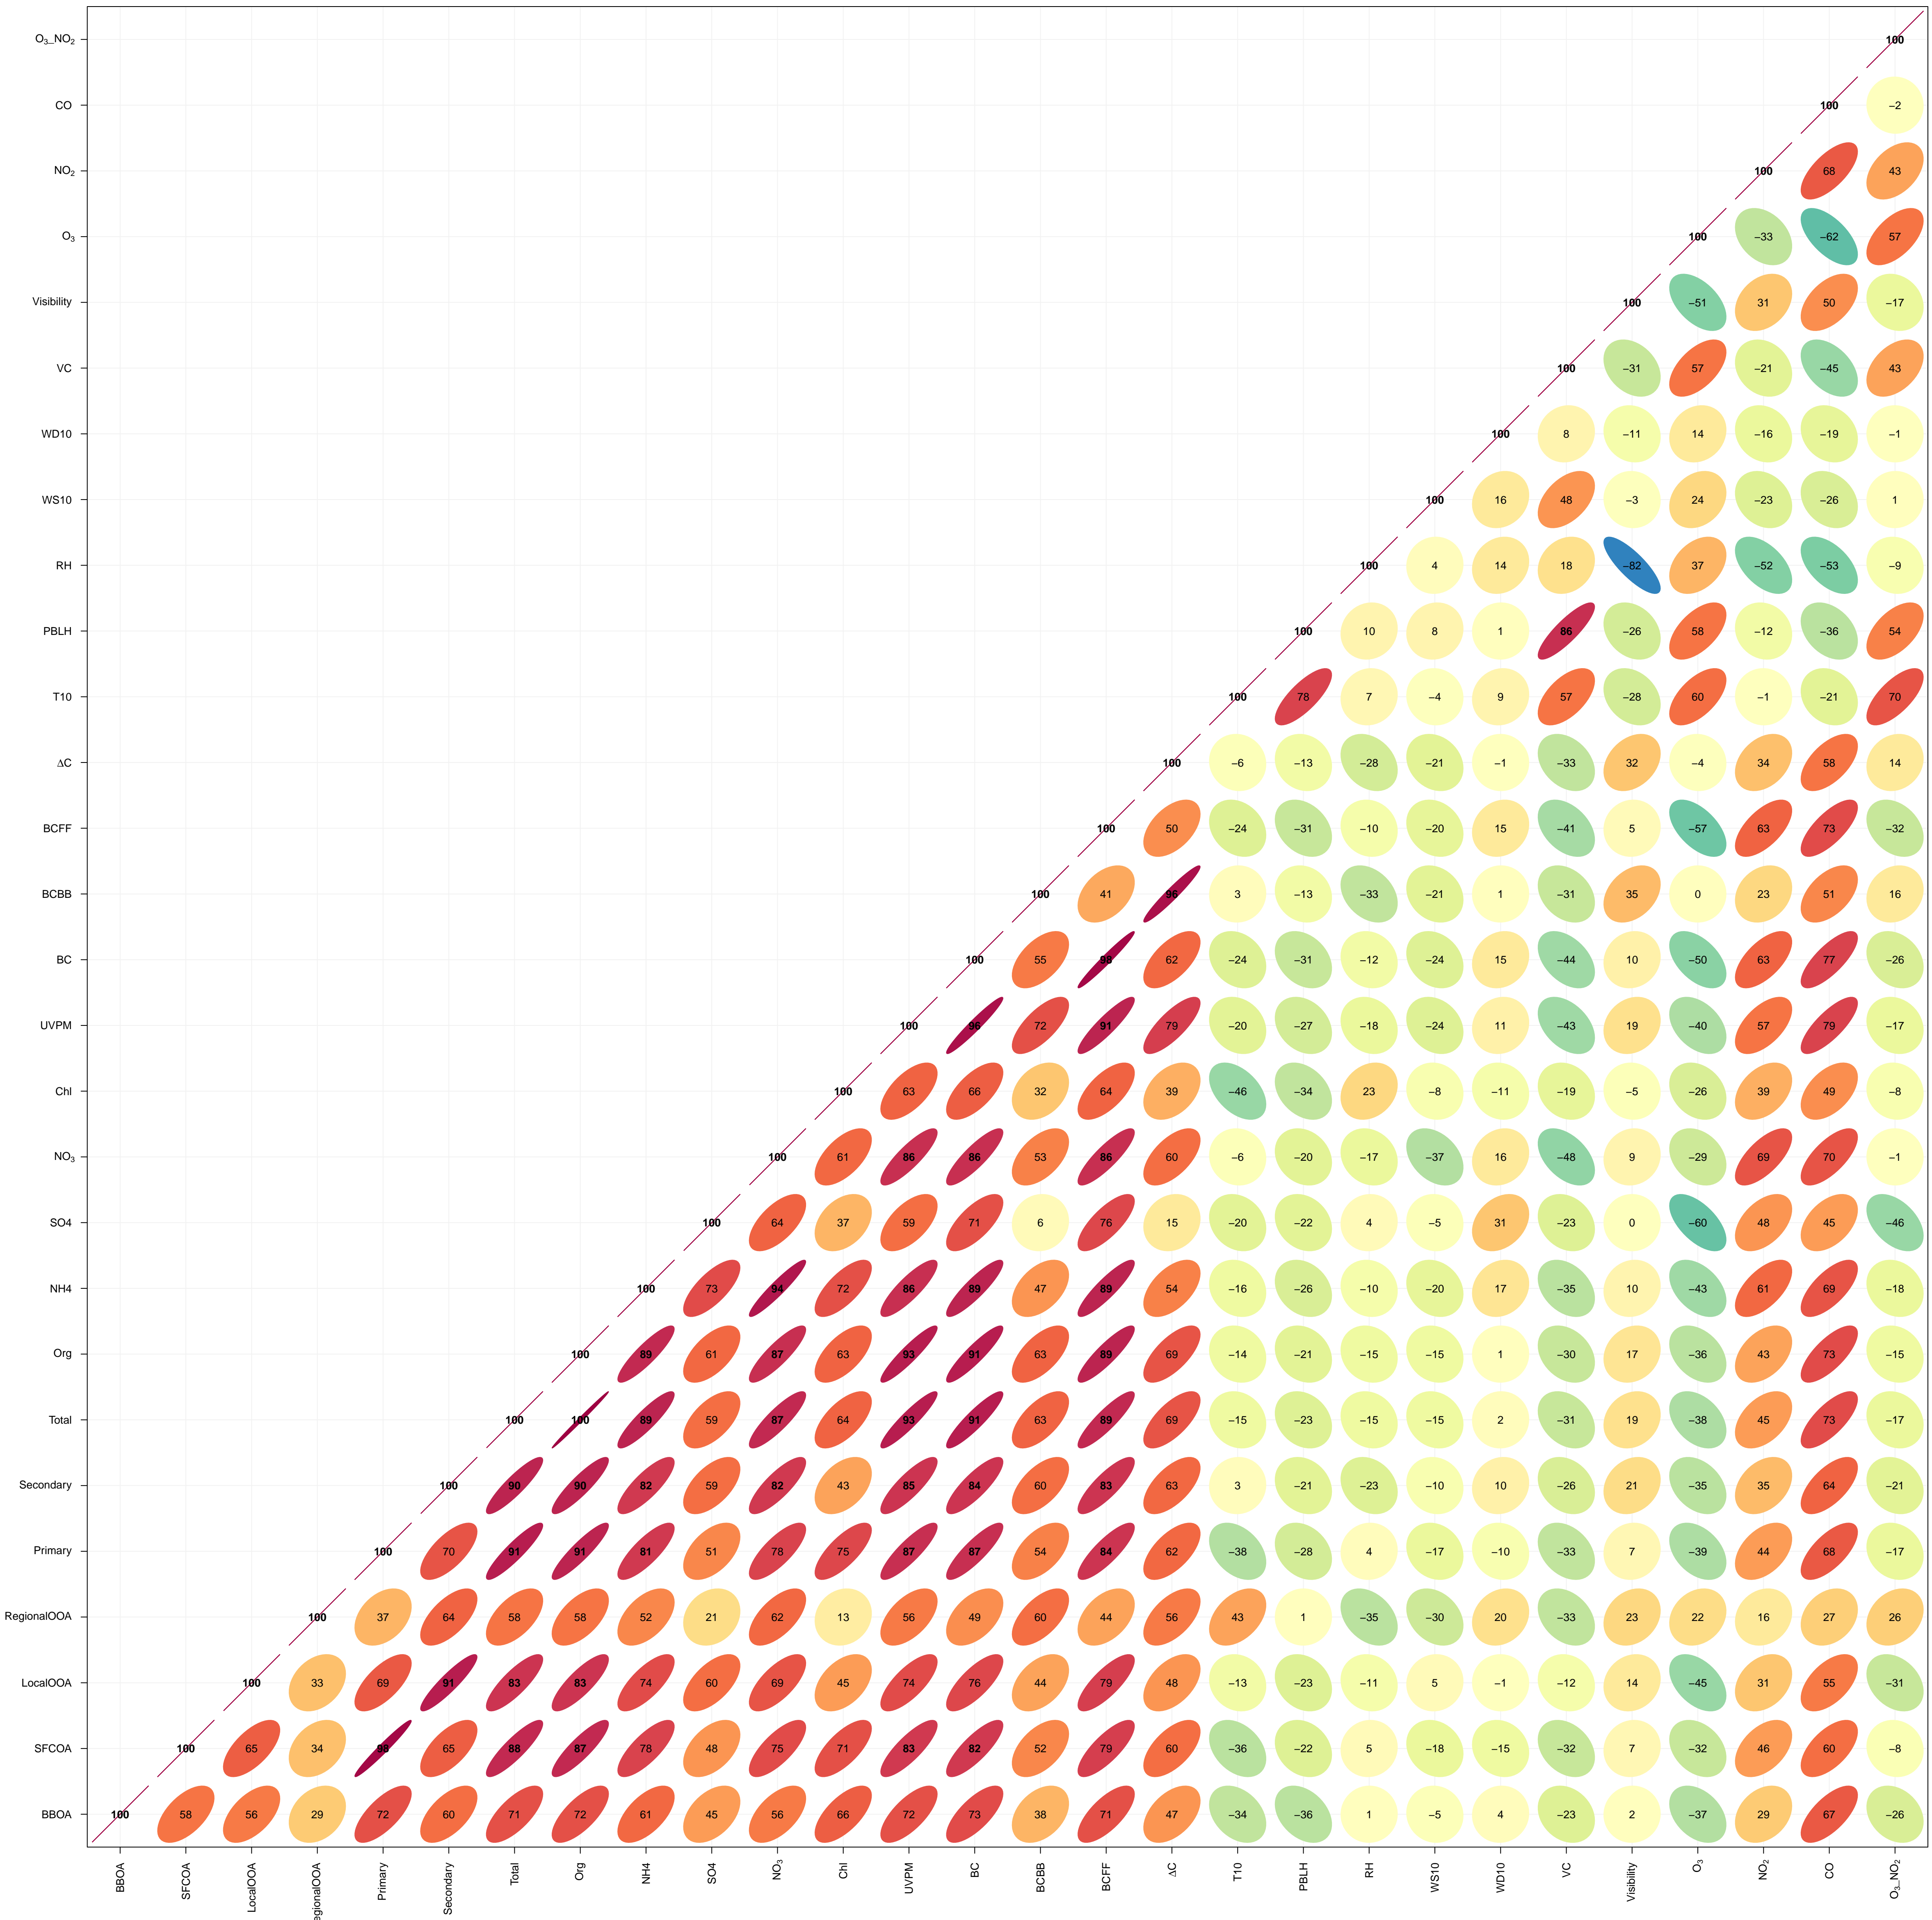

Supplement: Supplementary file 1 [file SupplementaryFile-FigS21.pdf › Methods_Supplement_2022_submission/SupplementaryFile-FigS21.pdf]

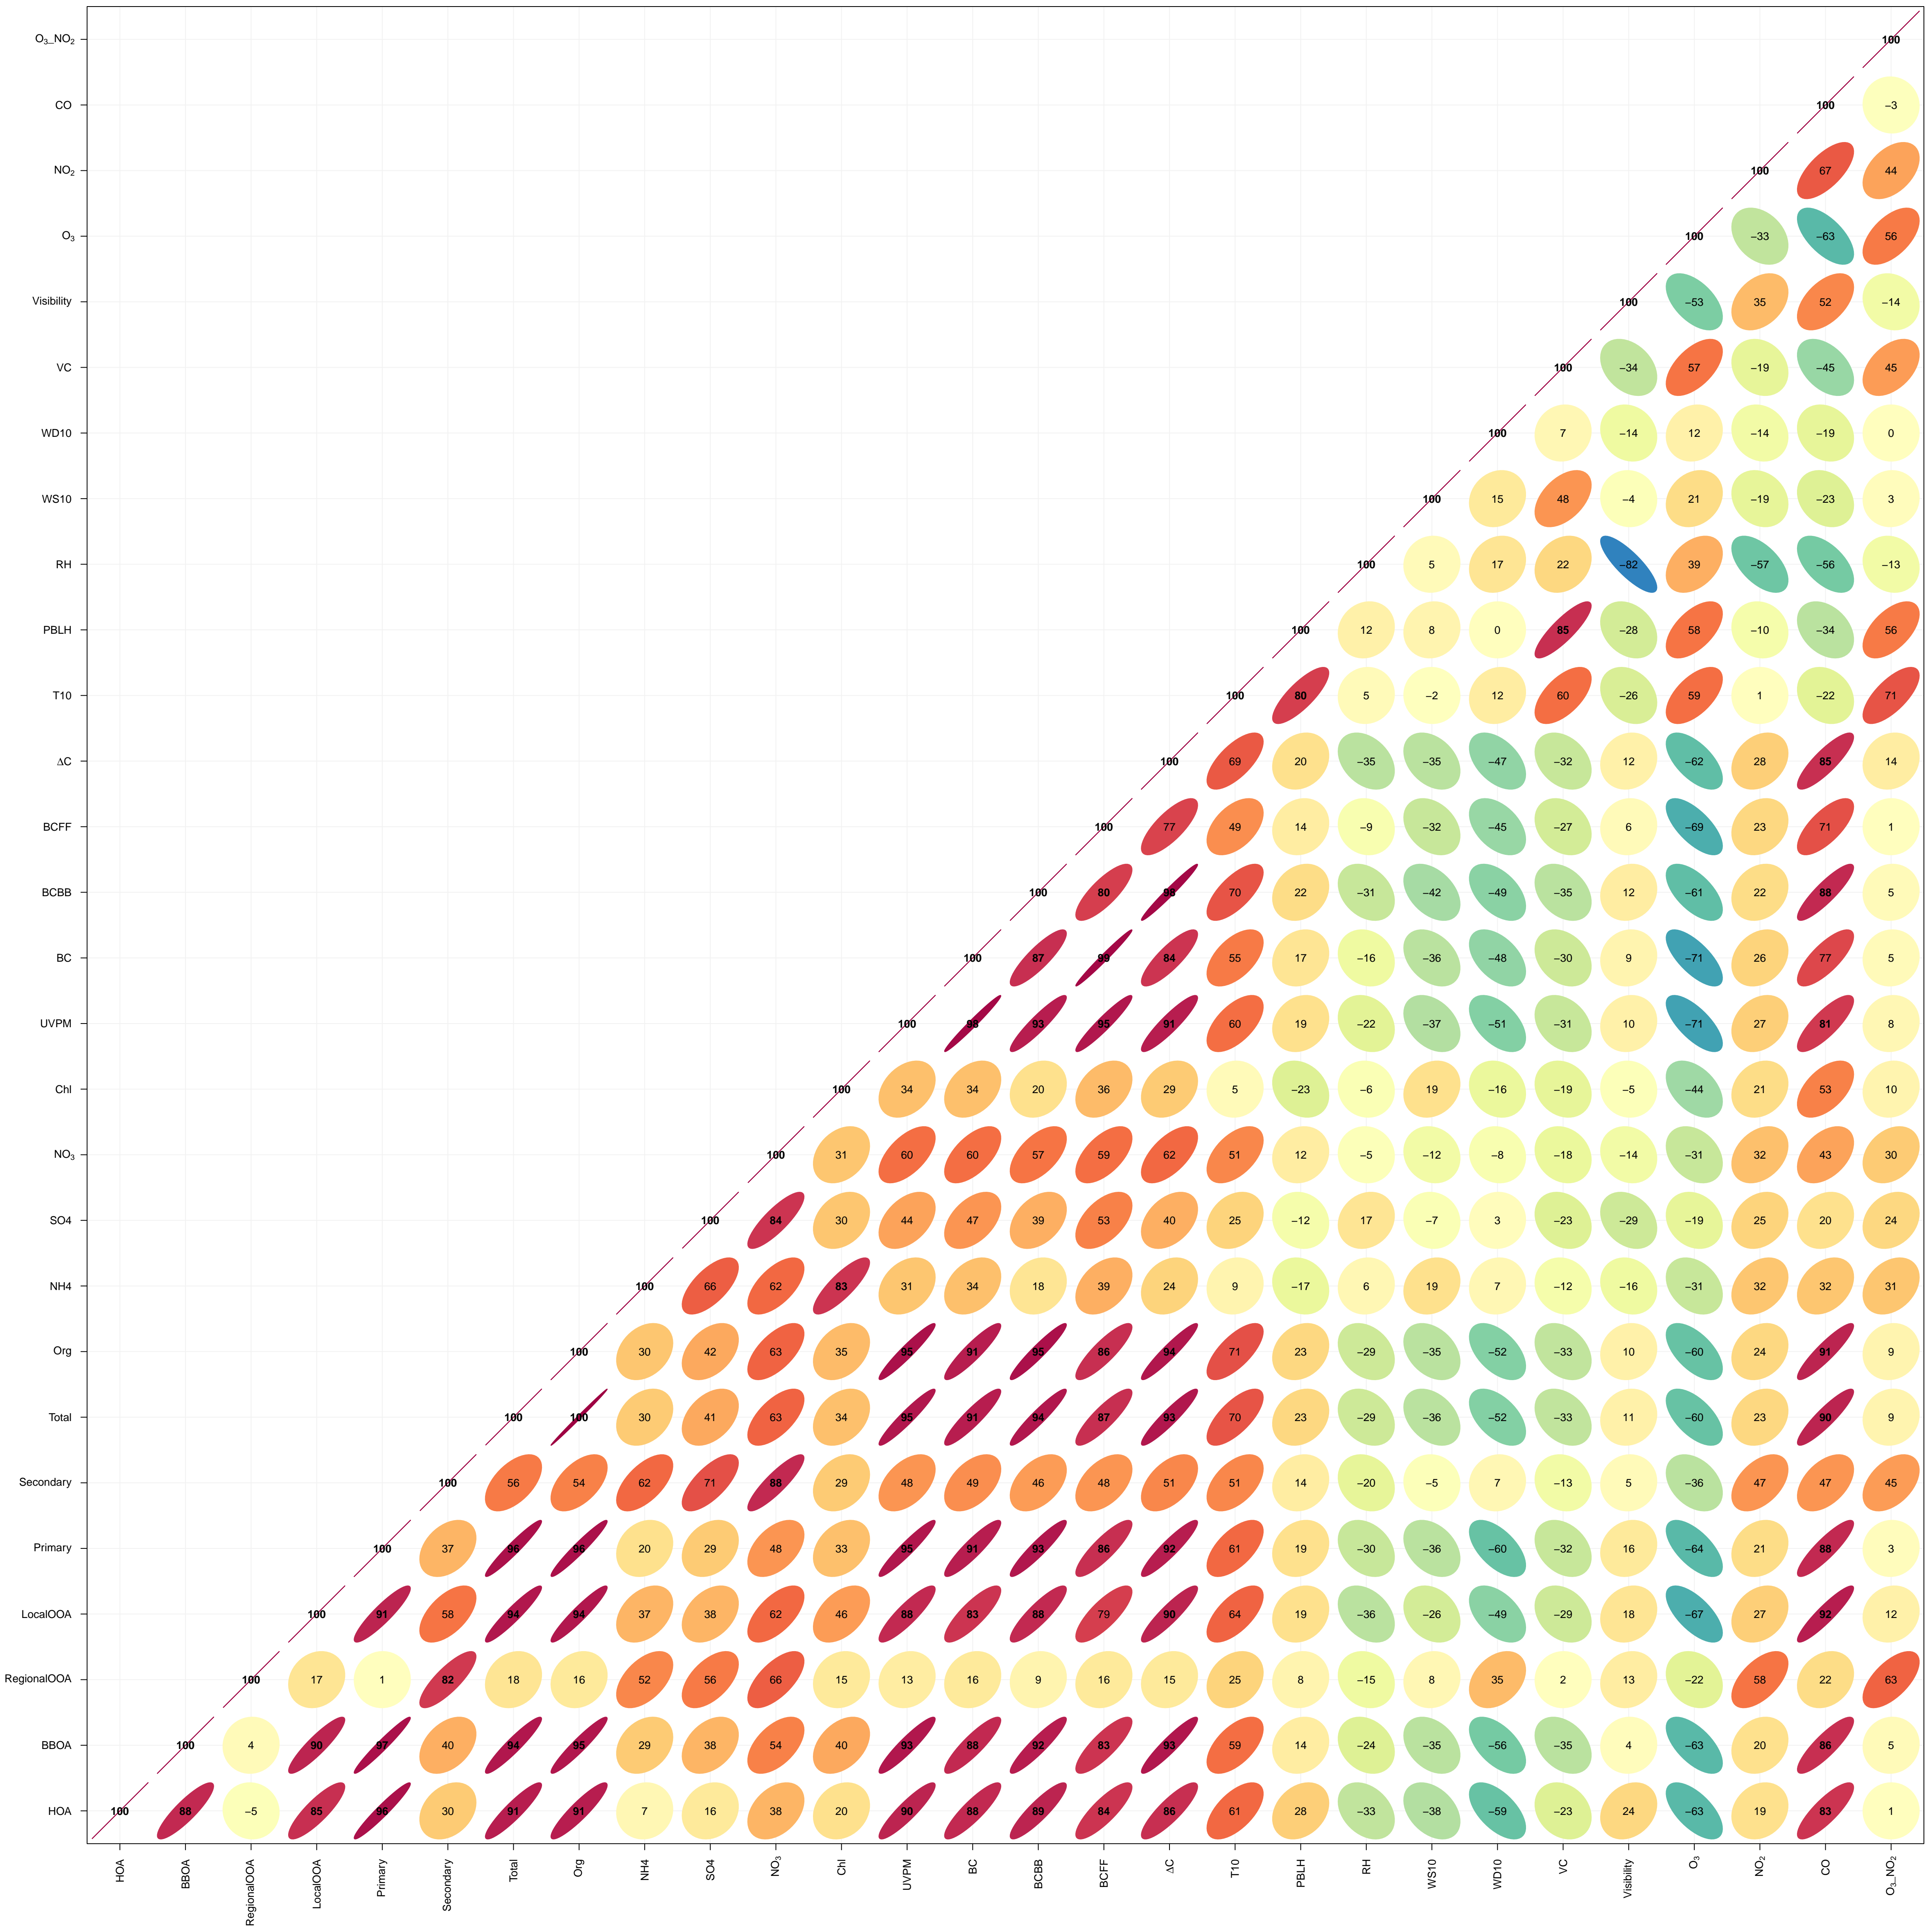

Supplement: Supplementary file 2 [file SupplementaryFile-FigS22.pdf › Methods_Supplement_2022_submission/SupplementaryFile-FigS22.pdf]

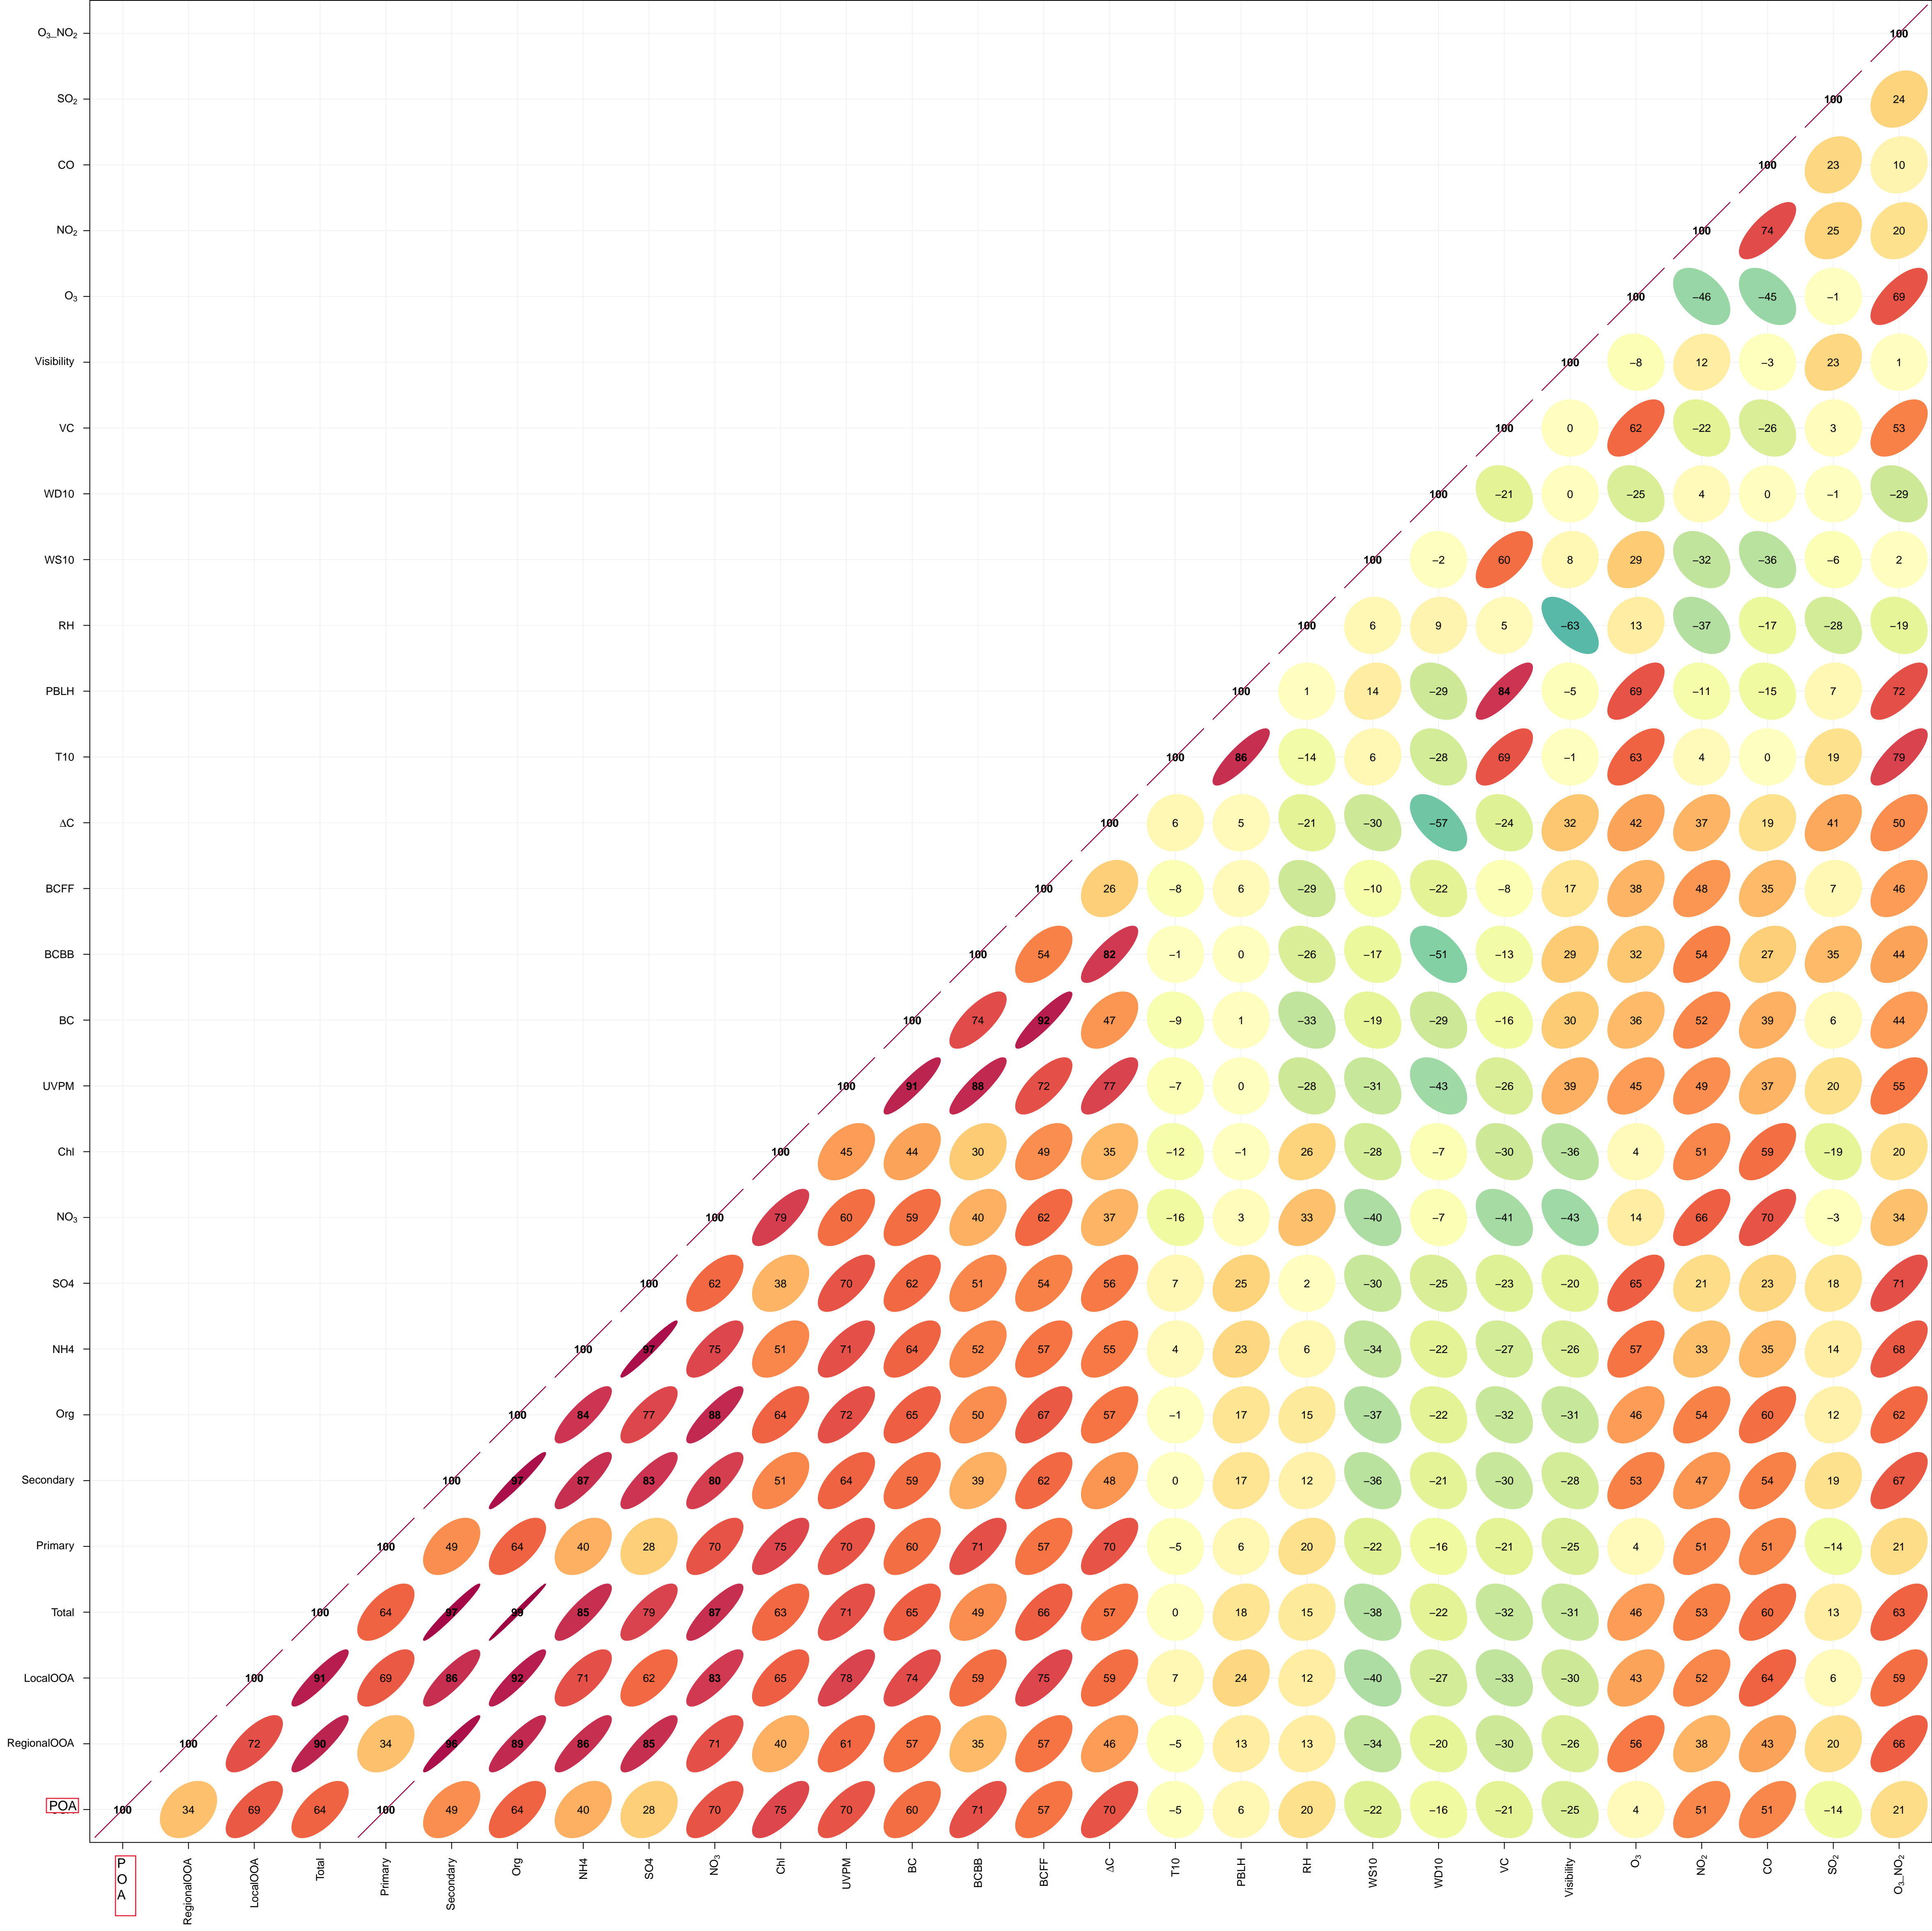

Supplement: Supplementary file 3 [file SupplementaryFile-FigS23.pdf › Methods_Supplement_2022_submission/SupplementaryFile-FigS23.pdf]

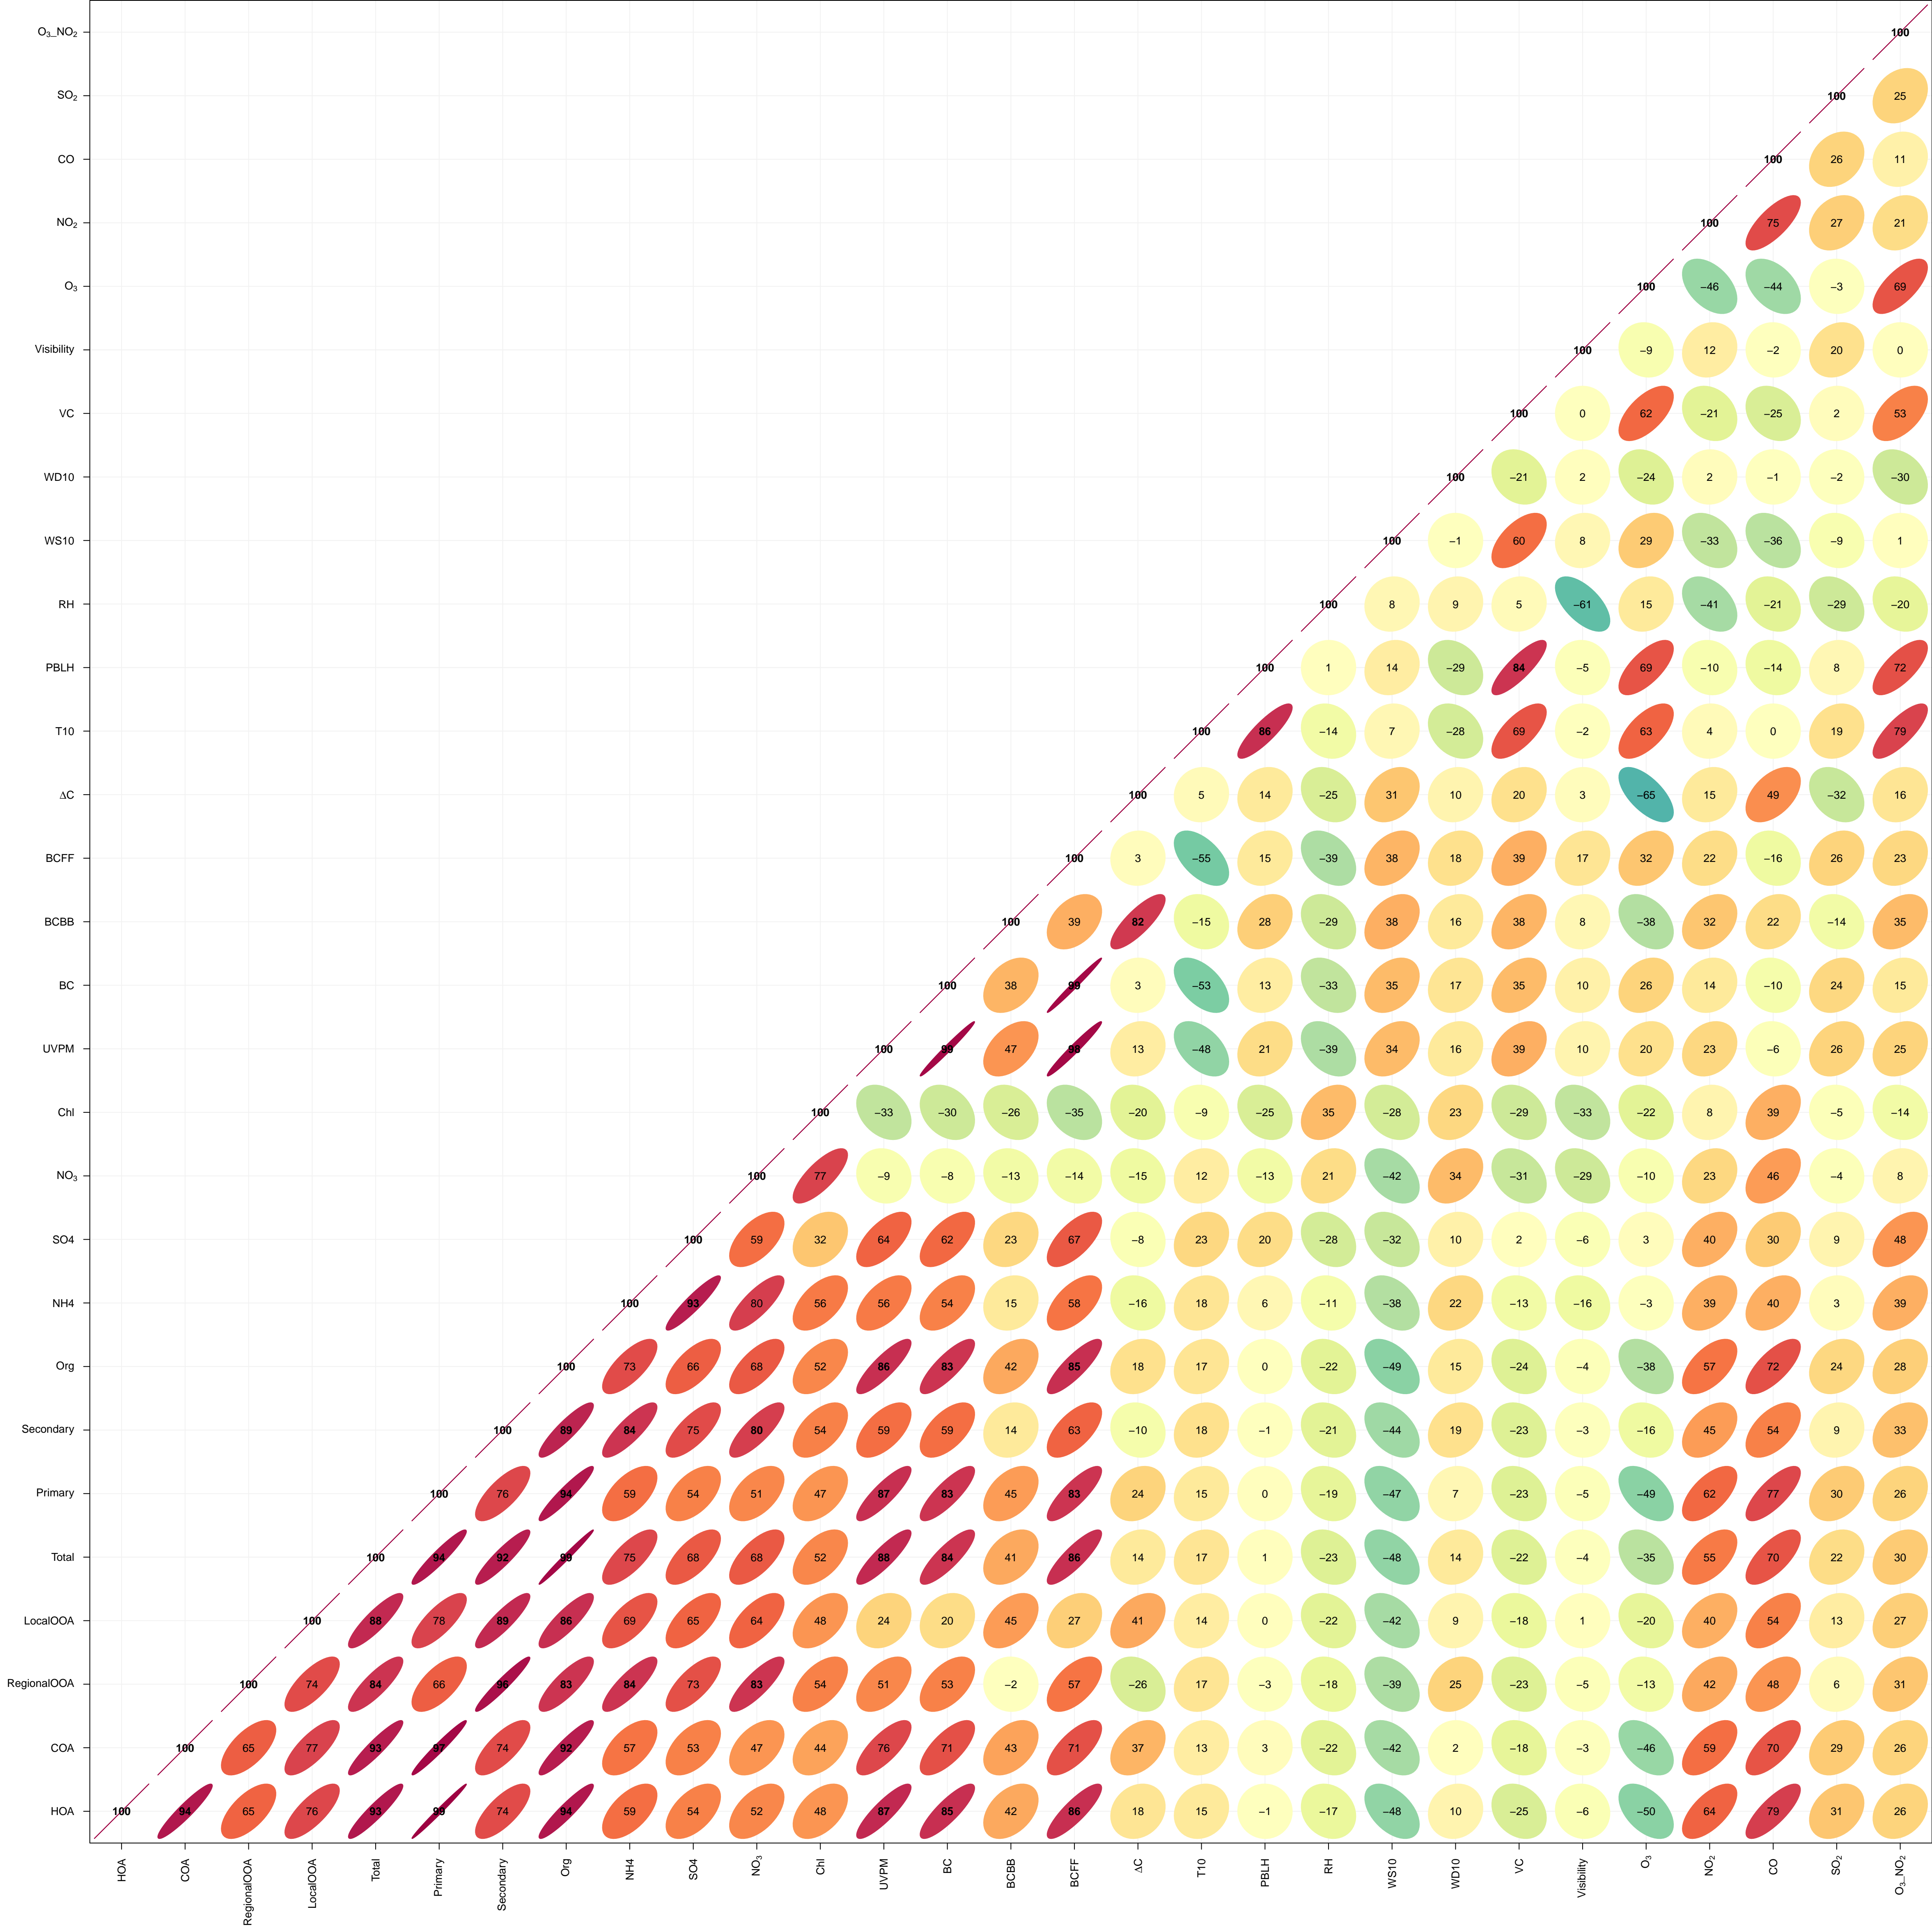

Supplement: Supplementary file 4 [file SupplementaryFile-FigS24.pdf › Methods_Supplement_2022_submission/SupplementaryFile-FigS24.pdf]

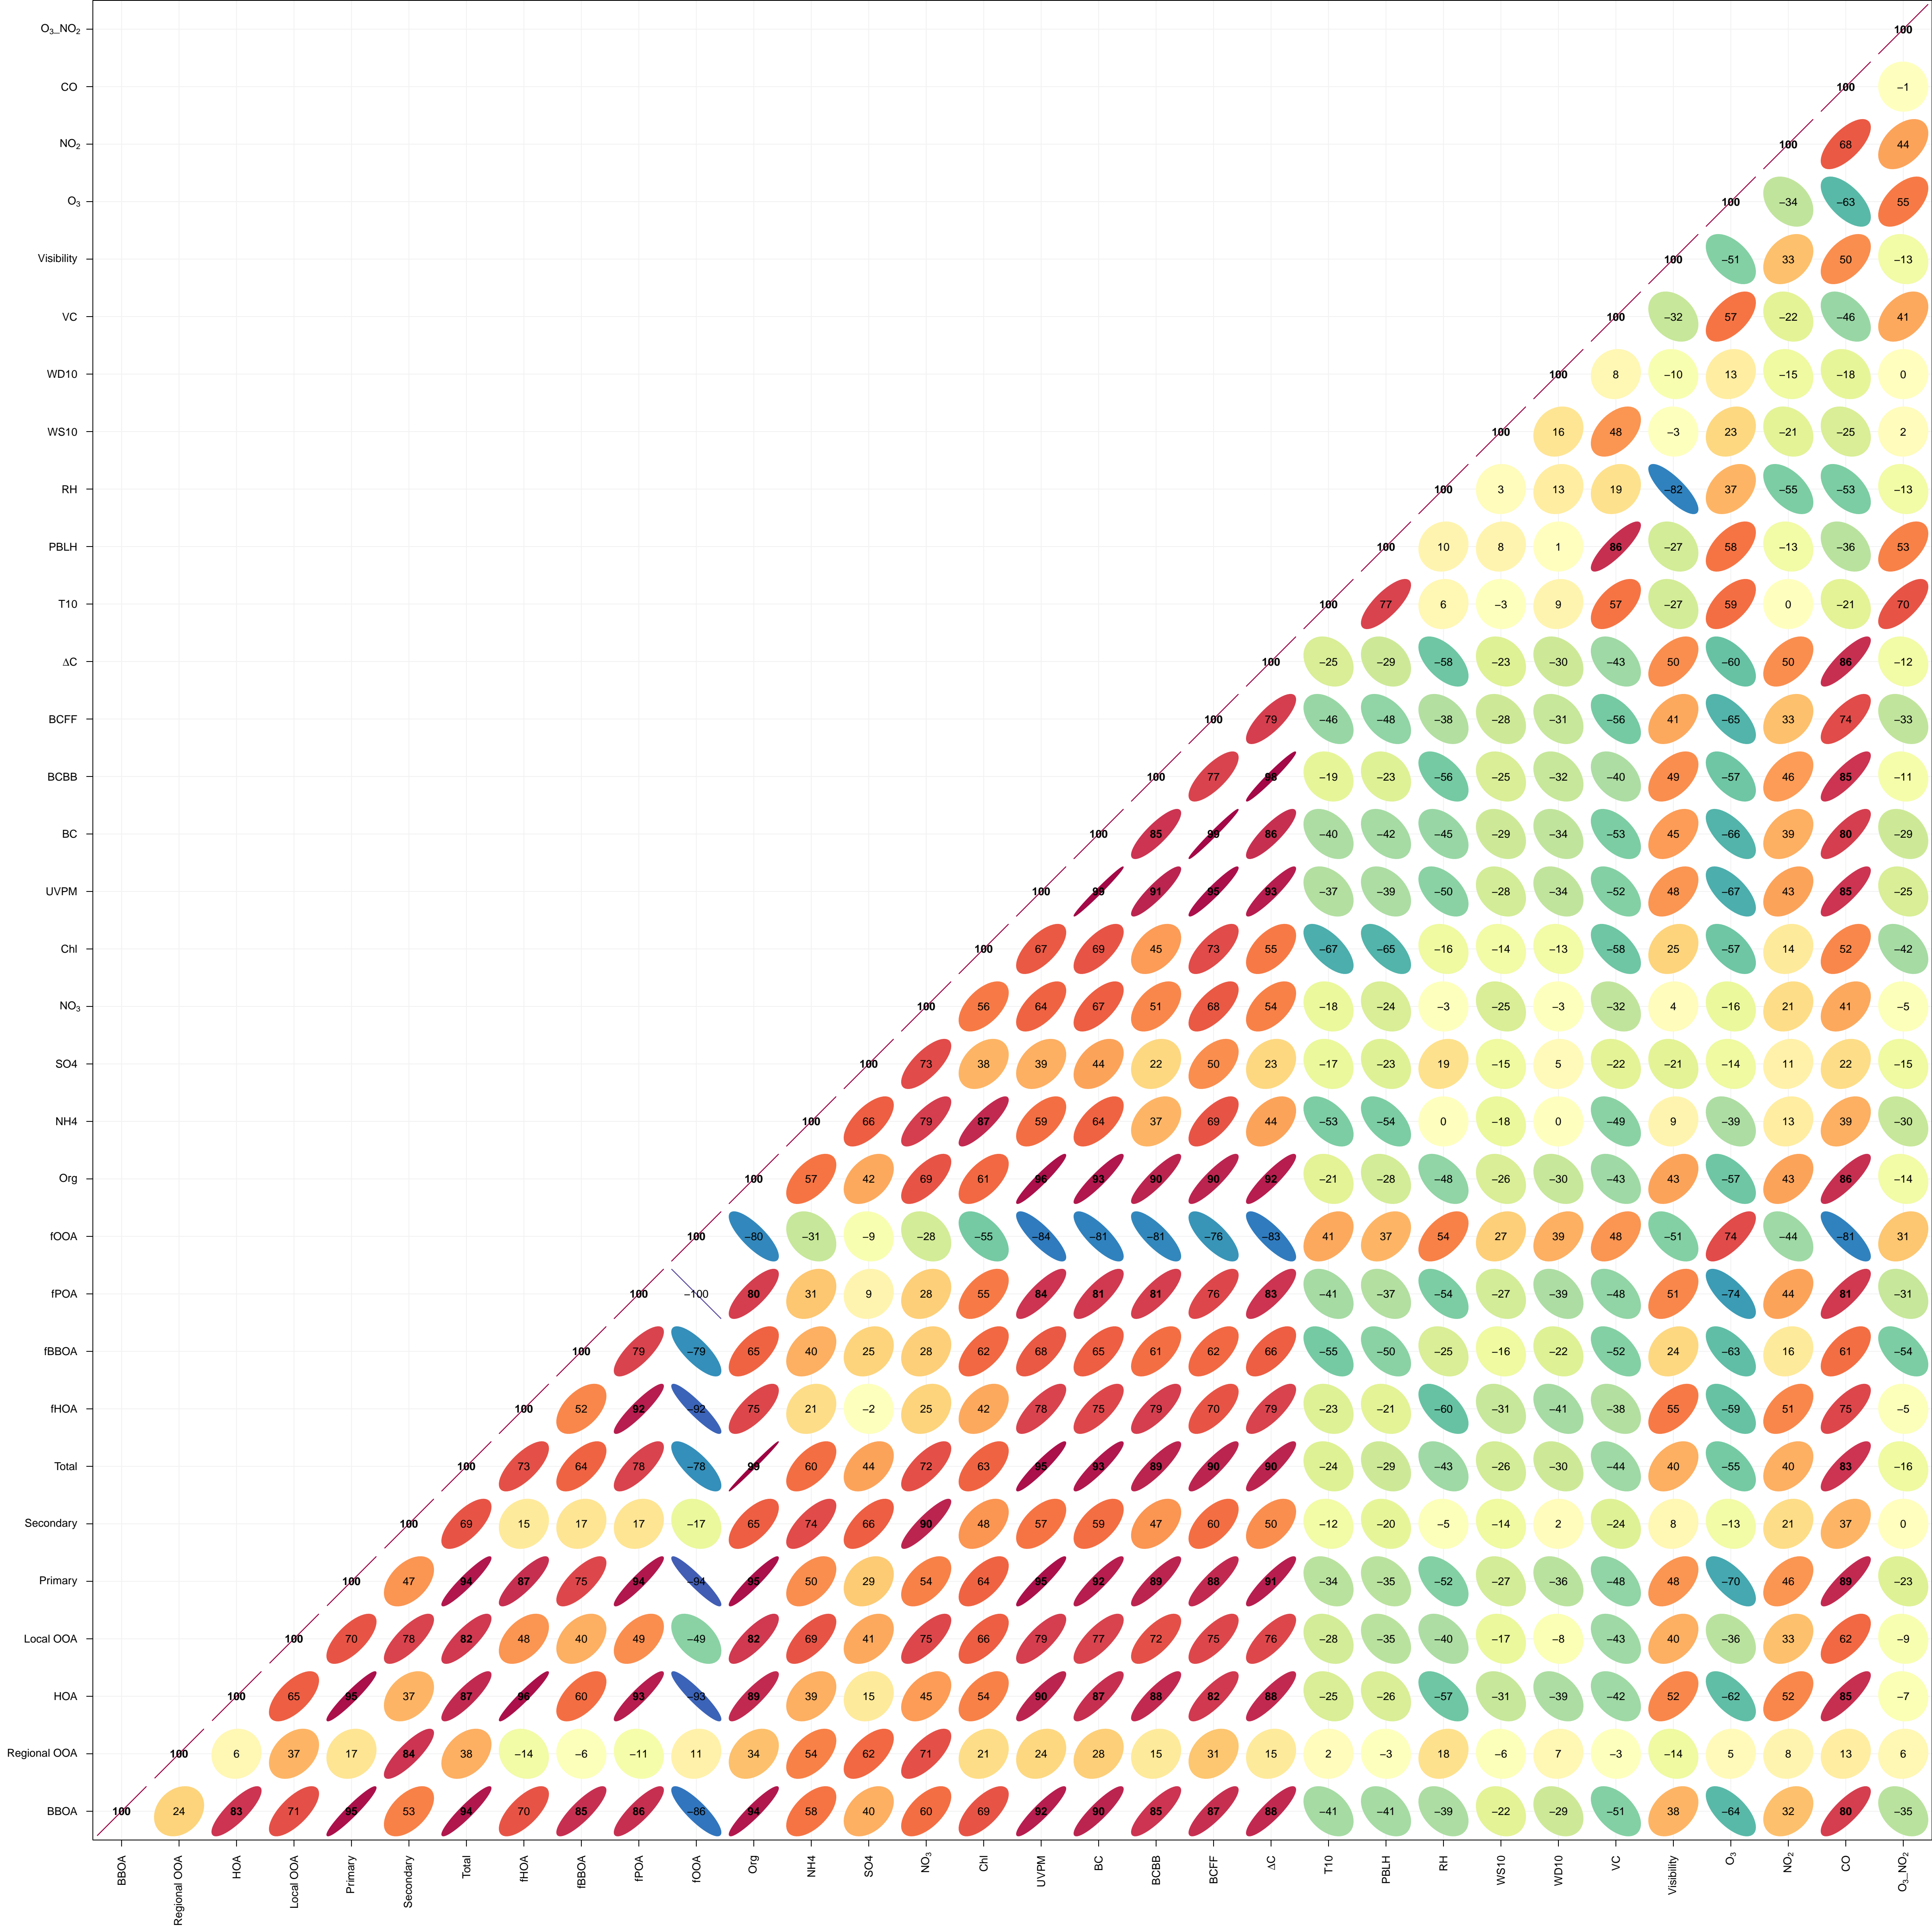

Supplement: Supplementary file 5 [file SupplementaryFile-FigS7.pdf › Methods_Supplement_2022_submission/SupplementaryFile-FigS7.pdf]

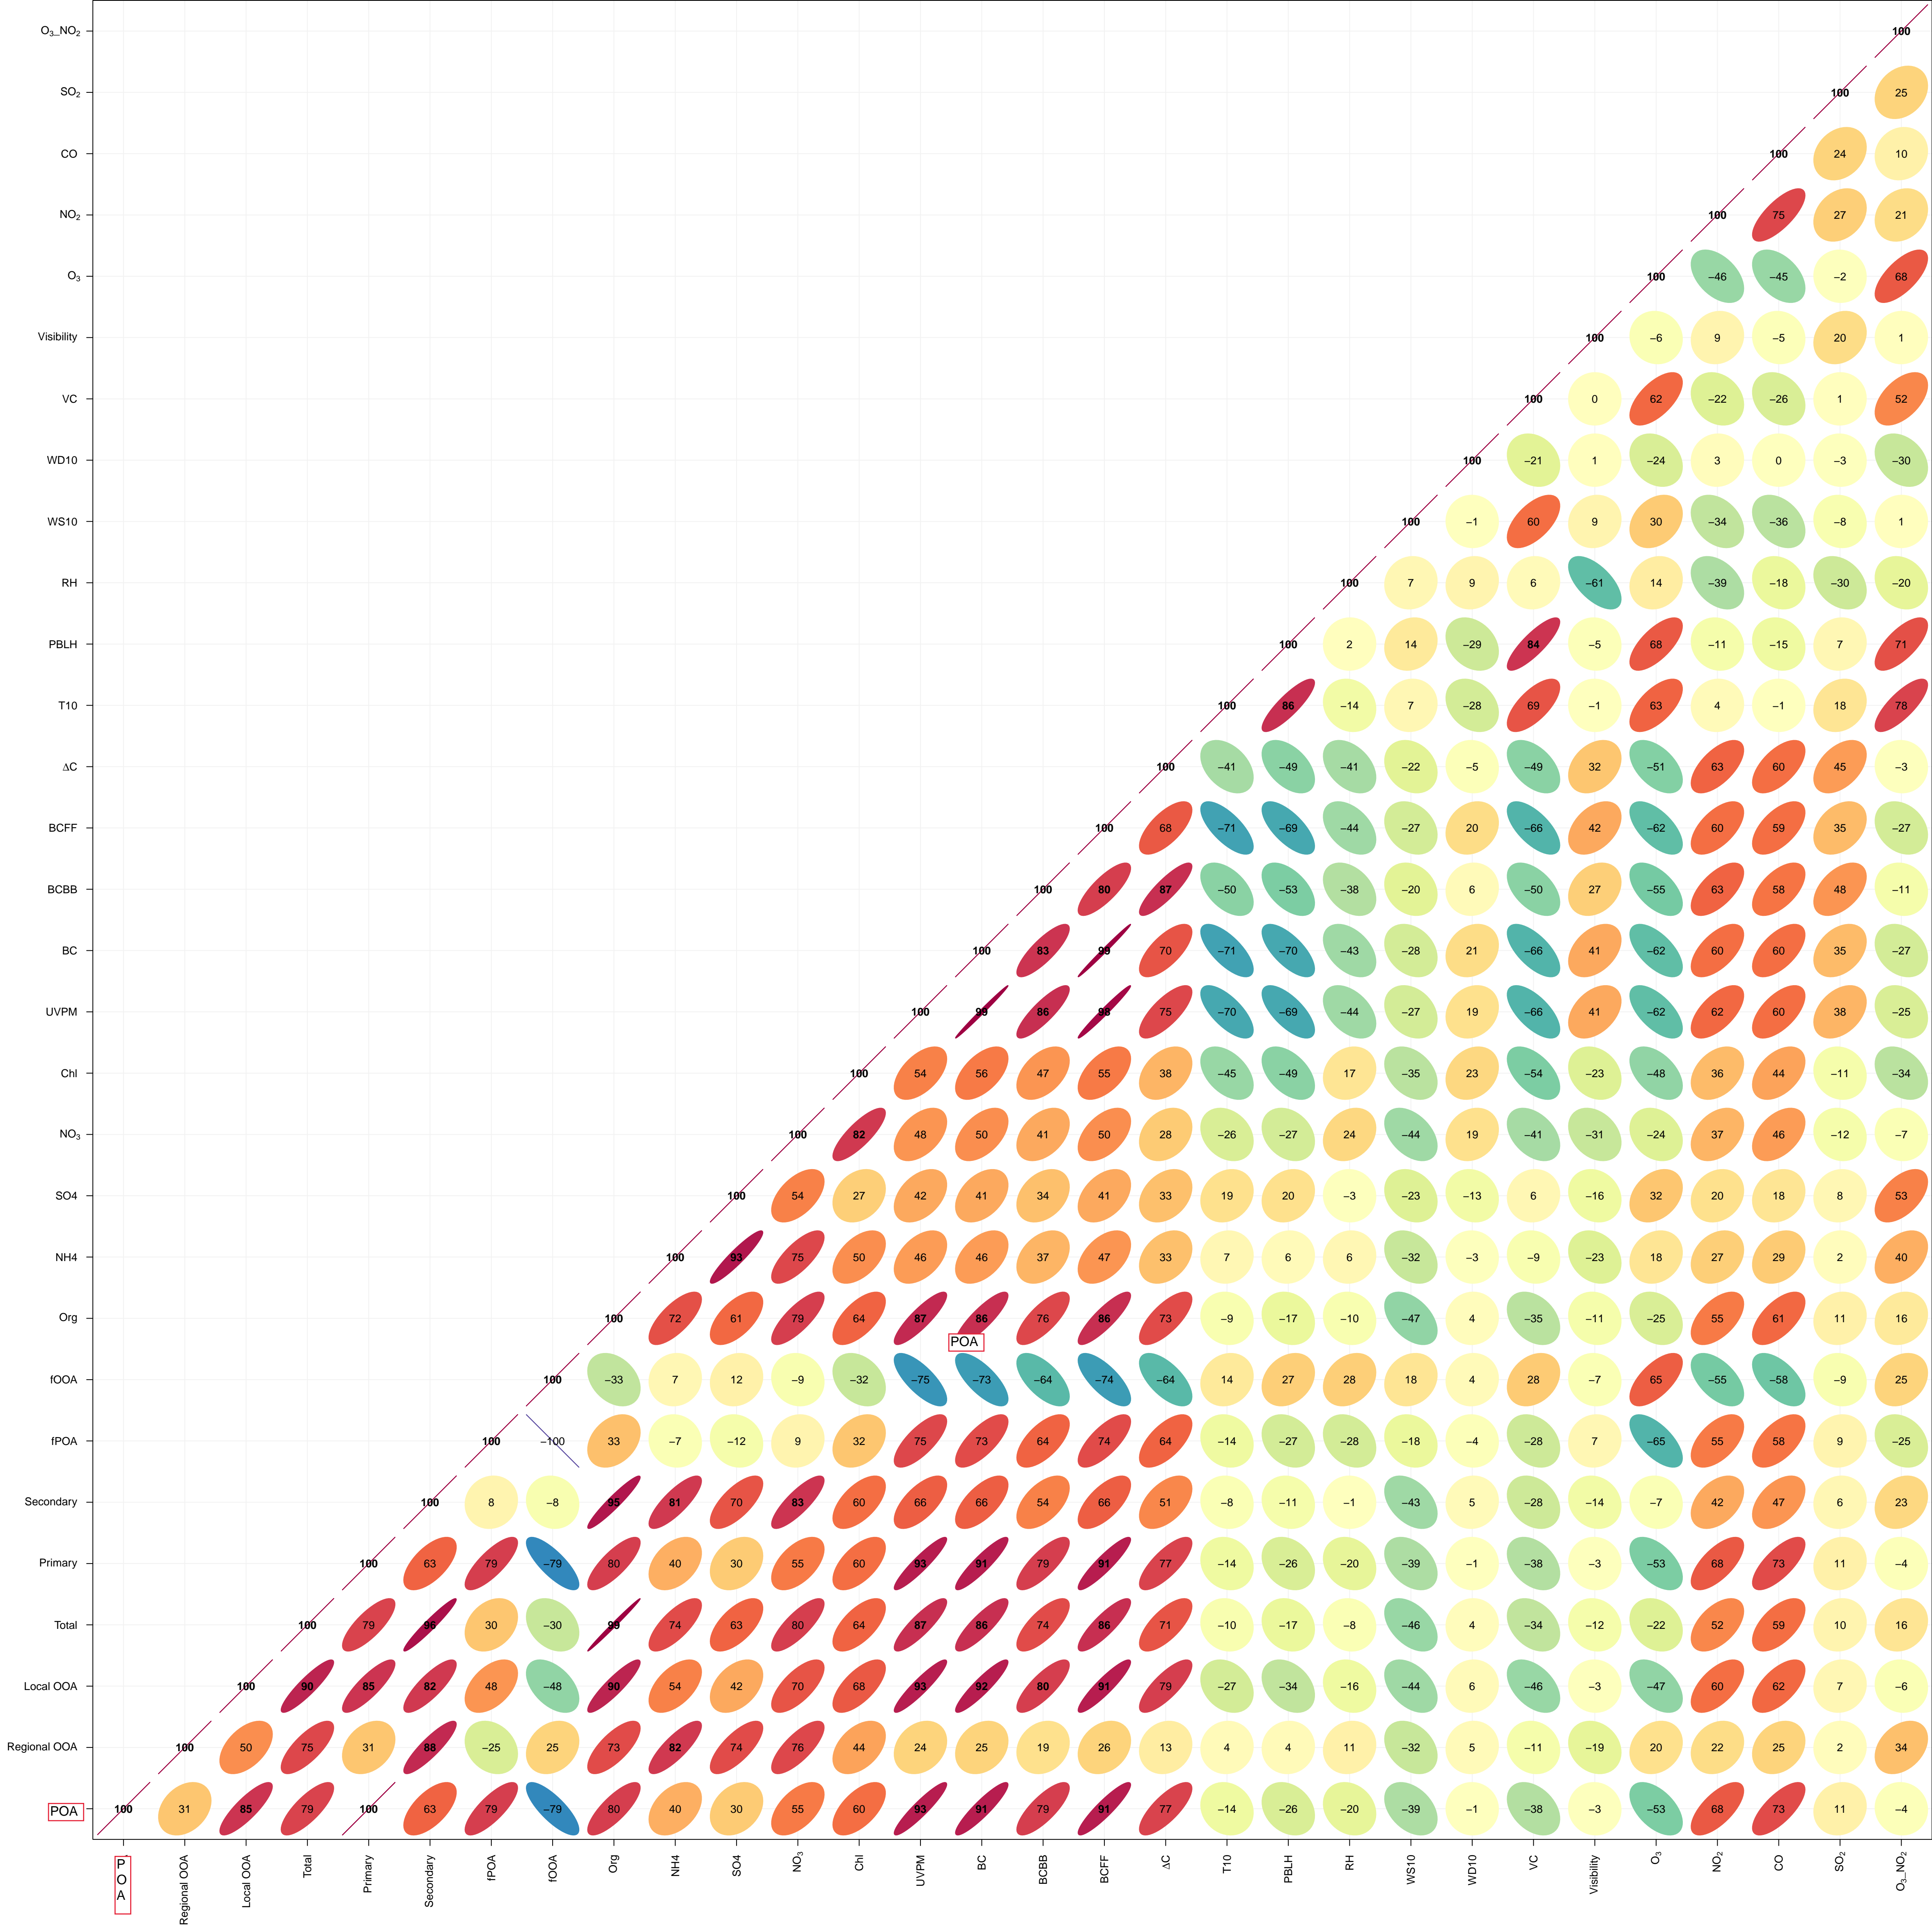

Supplement: Supplementary file 6 [file SupplementaryFile-FigS8.pdf › Methods_Supplement_2022_submission/SupplementaryFile-FigS8.pdf]
